# Supplementary material for: A two-dimensional PtSe2 thin film coupled with a graphene/Si Schottky junction for a high-performance photodetector
Source: Royal Society of Chemistry journal article supplement (doi:10.1039/d4nr03150d), 2024-01-01
Supplement: d4nr03150d1.pdf [file d4nr03150d1.pdf]

## **Two-dimensional PtSe<sub>2</sub> thin-film coupled with graphene/Si Schottky-junction for high performance photodetector**

Qinghai Zhu<sup>a</sup>, Shiyu Wei<sup>a</sup>, Jiabao Sun<sup>b</sup>, Yijun Sun<sup>b</sup>, and Mingsheng Xu<sup>\*a</sup>

<sup>a</sup> *College of Integrated Circuits, State Key Laboratory of Silicon and Advanced Semiconductor Materials, Zhejiang University, Hangzhou 310027, China*

<sup>b</sup> *College of Information Science & Electronic Engineering, Zhejiang University, 38 Zheda Road, Hangzhou 310027, China*

Address correspondence to Mingsheng Xu, [msxu@zju.edu.cn](mailto:msxu@zju.edu.cn)

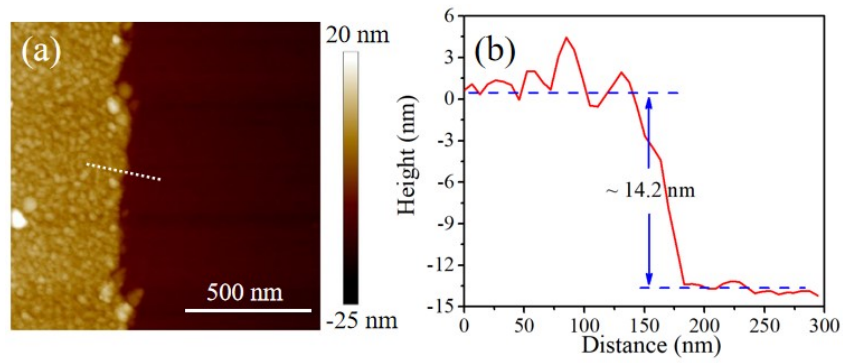

Fig. S1 (a) AFM image of PtSe<sub>2</sub> film. (b) The height profile along the white line marked in (a).

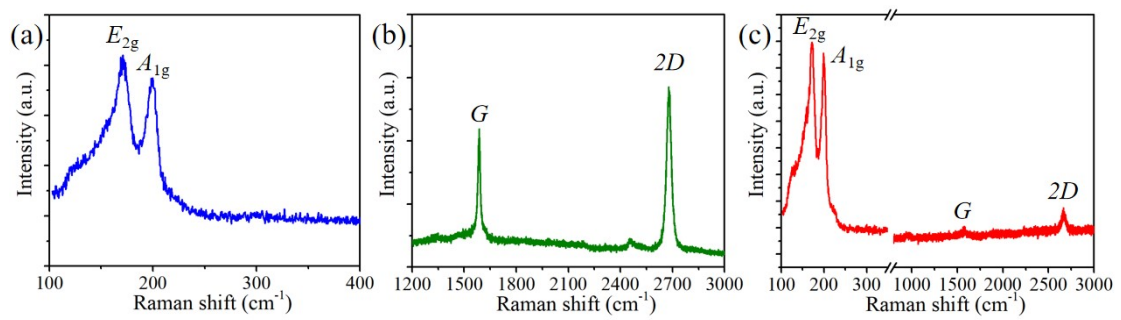

Fig. S2 Raman spectra of (a) PtSe<sub>2</sub>, (b) graphene, and (c) PtSe<sub>2</sub>/graphene heterojunction.

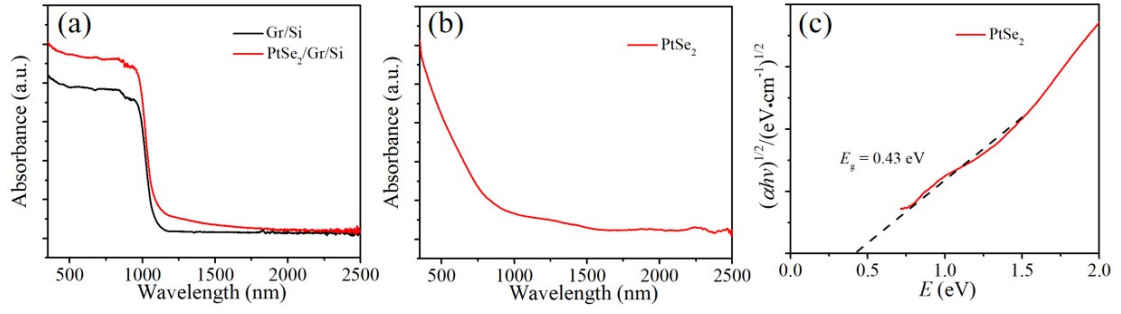

Fig. S3 UV-VIS-NIR absorption spectra of (a) Gr/Si and PtSe<sub>2</sub>/Gr/Si heterojunction, and (b) PtSe<sub>2</sub> film. (c) Tauc plot of PtSe<sub>2</sub> film showing the bandgap of 0.43 eV.

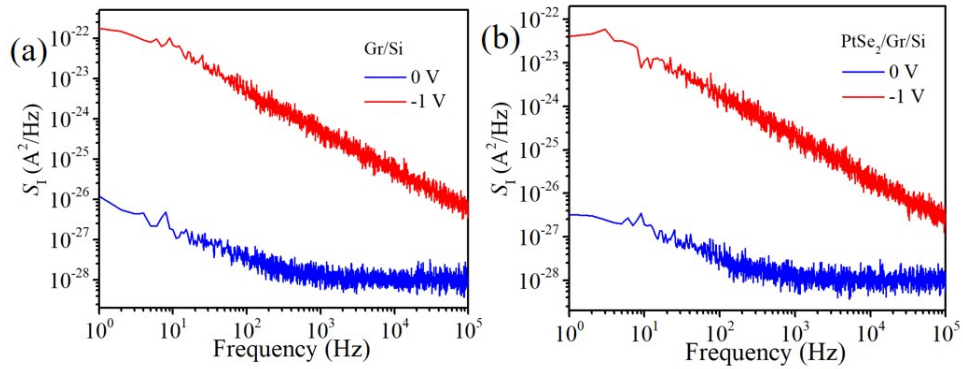

Fig. S4 The noise density spectra of (a) Gr/Si and (b) PtSe<sub>2</sub>/Gr/Si devices as a function of frequency.

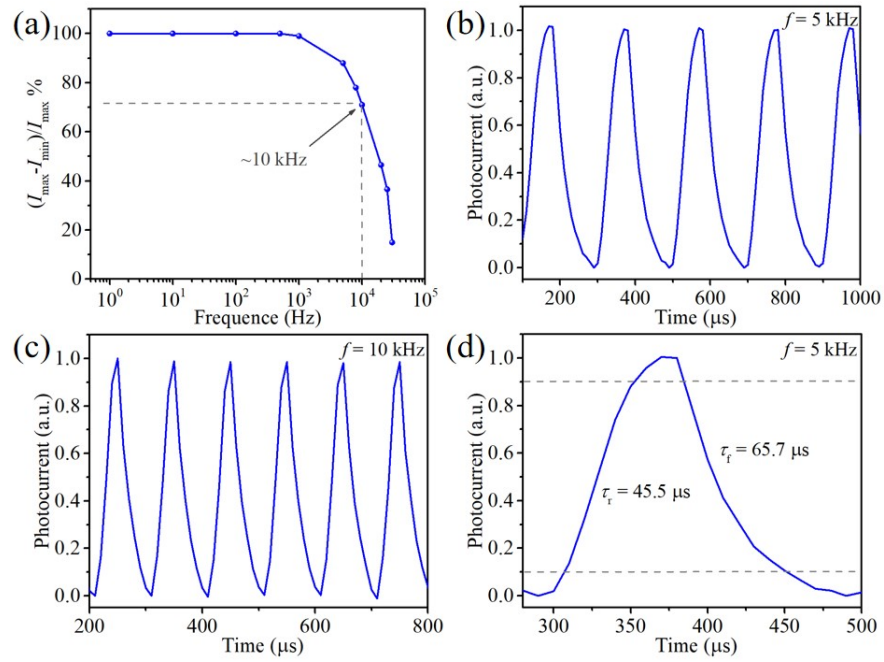

Fig. S5 (a) Relative balance of  $(I_{\max} - I_{\min})/I_{\max}$  versus different frequencies of Gr/Si device under 808 nm illumination. Normalized photoresponse of Gr/Si PD with various laser frequencies of (b) 5, and (c) 10 kHz. (d) Response speed of Gr/Si PD extracted at 5 kHz. All the measurements were carried out at a bias voltage of -1 V.
